# Supplementary material for: Multidecadal variability and predictability of Antarctic sea ice in the GFDL SPEAR_LO model
Source: Copernicus journal article supplement (doi:10.5194/tc-17-5219-2023), 2023-12-08
Supplement: Supplementary file 1 [file tc-17-5219-2023-supplement.pdf]

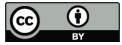

*Supplement of*

## **Multidecadal variability and predictability of Antarctic sea ice in the GFDL SPEAR\_LO model**

**Yushi Morioka et al.**

*Correspondence to:* Yushi Morioka ([morioka@jamstec.go.jp](mailto:morioka@jamstec.go.jp))

The copyright of individual parts of the supplement might differ from the article licence.

1

## Supplementary Material

2

3

### 4 **Contents of this file**

5

6 Fig. S1 to S8

### 7 **Introduction**

8 This supplementary material provides the initial sea ice states, seasonal cycles of Antarctic sea  
9 ice extent (SIE) climatology and decadal sea ice concentration (SIC) variability, the SIC  
10 associated with the past two polynya events (1974-1976 and 2016-2017), year-to-year  
11 prediction skills of the Antarctic SIC, seasonal dependence of decadal SIC predictability, and  
12 normalized predicted SIC anomalies.

13

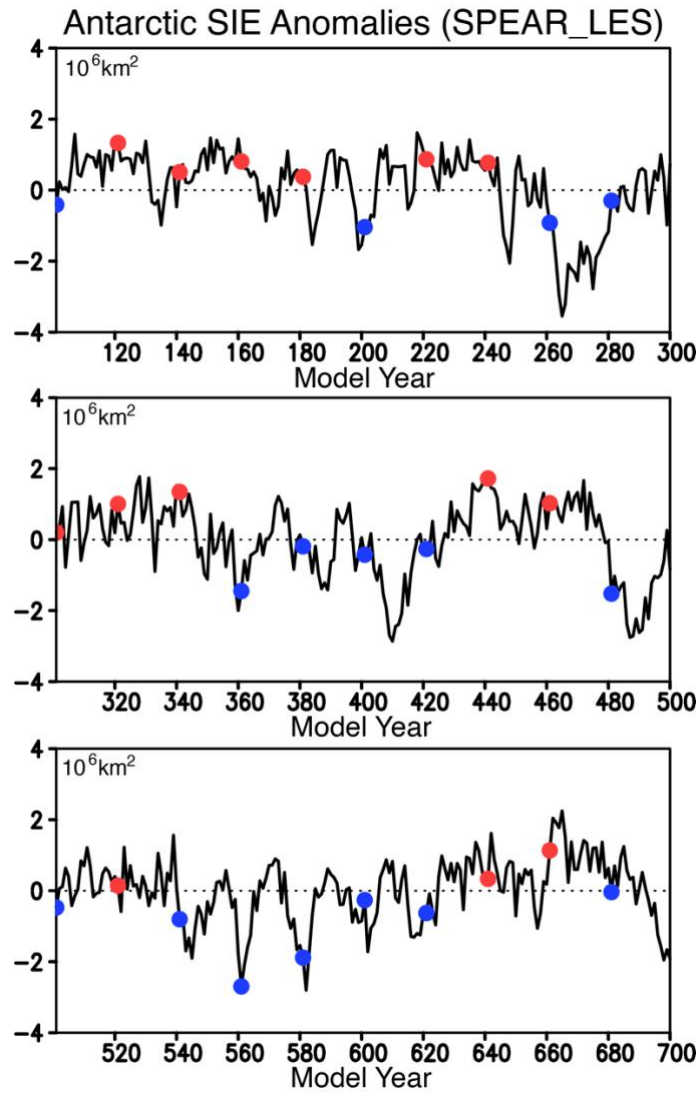

14

15 **Figure S1** Time series of Antarctic SIE anomalies (in  $10^6 \text{ km}^2$ ) from 101 to 700 years for the  
 16 SPEAR\_LES. Red and blue dots indicates the SPEAR\_LO\_DCIS start years (101, 121, ...,  
 17 681 with 20 years interval) with positive and negative SIE anomalies to generate large  
 18 ensemble members.

19

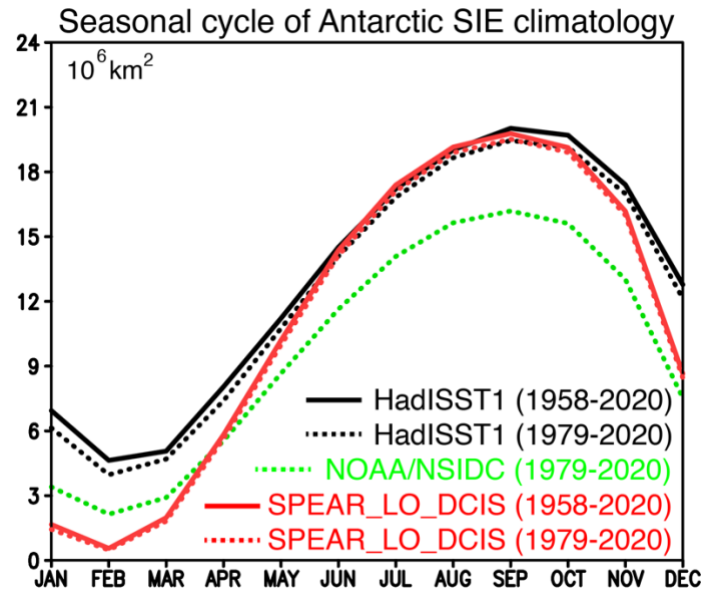

20

21 **Figure S2** Seasonal cycle of Antarctic sea ice extent (SIE in  $10^6 \text{ km}^2$ ) climatology from the  
 22 HadISST1 (black), the NOAA/NSIDC (green), and 30 ensemble members average of the  
 23 SPEAR\_LO\_DCIS (red). Solid lines indicate the monthly climatology during 1958-2020,  
 24 while dashed lines represent the climatology during 1979-2020.

25

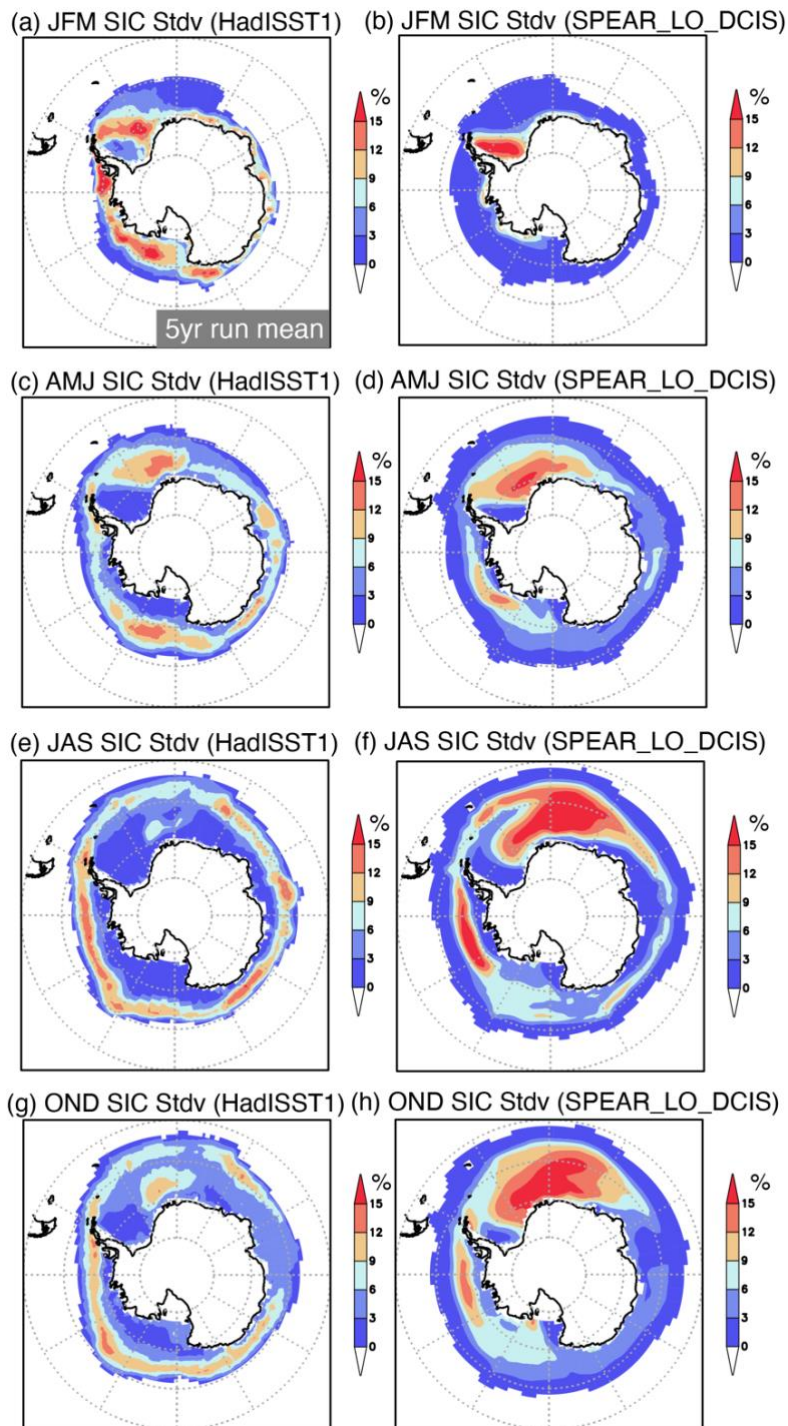

26

27 **Figure S3** Standard deviation of 5-yr running mean SIC anomalies (in %) during austral  
 28 summer (January-March; JFM) of 1958-2020 from (a) the HadISST1 and (b)  
 29 SPEAR\_LO\_DCIS. Same as in (a, b), but for (c, d) austral autumn (April-June; AMJ), (e, f)  
 30 austral winter (July-September; JAS), and (g, h) austral spring (October-December).

31

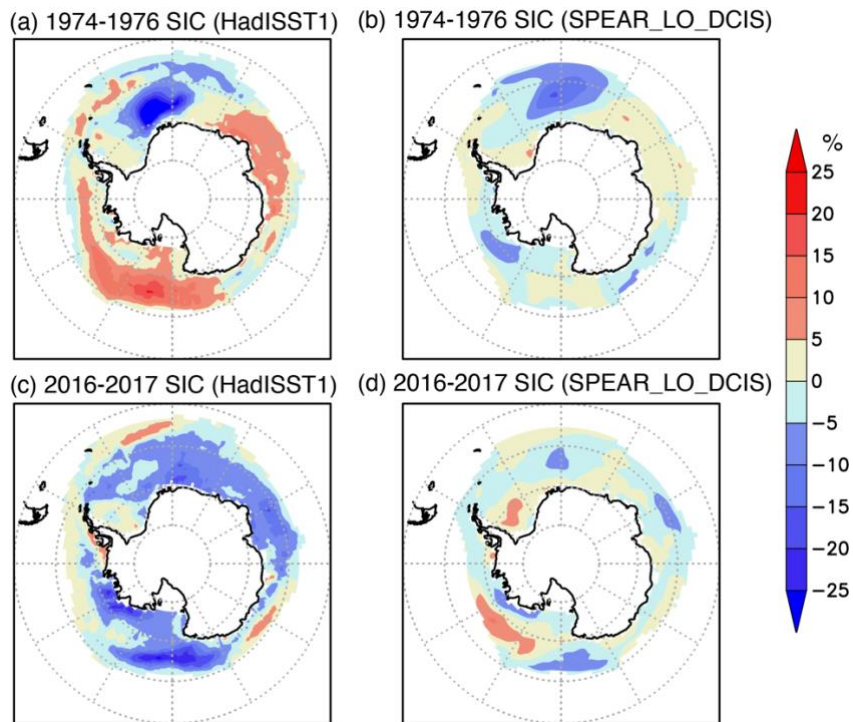

32

33 **Figure S4 (a)** Sea ice concentration (SIC, in %) anomaly averaged over 1974-1976 from the  
 34 HadISST1. **(b)** Same as in **(a)**, but for the SIC from the SPEAR\_LO\_DCIS. **(c, d)** Same as in  
 35 **(a, b)**, but for the SIC anomalies averaged over 2016-2017.

36

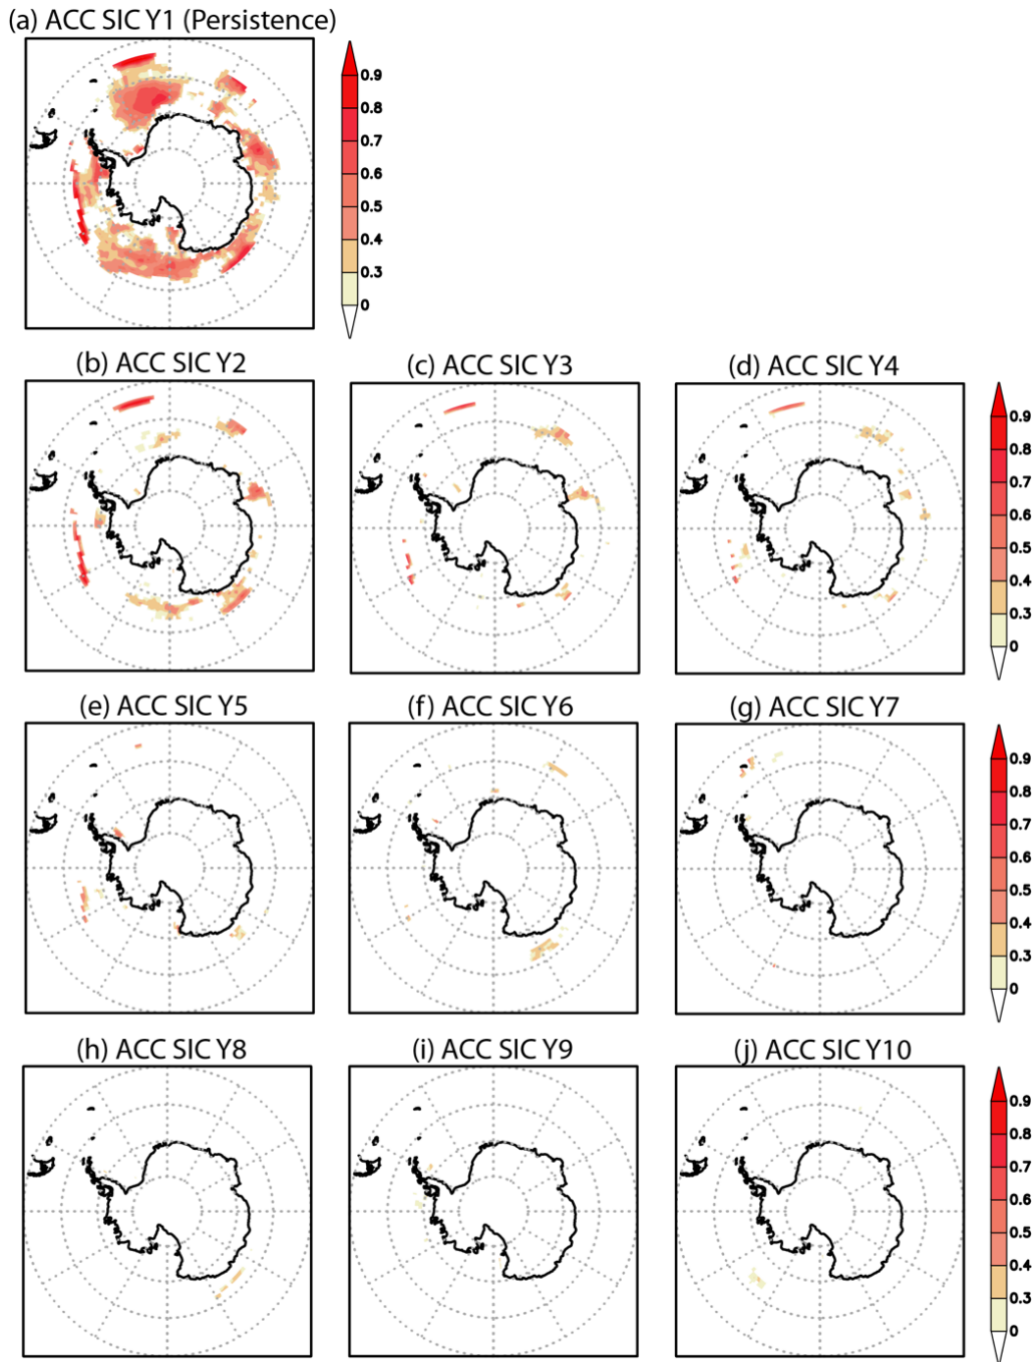

37

38 **Figure S5** (a) Anomaly correlation (ACC) of the sea ice concentration (SIC) from the  
 39 persistence prediction based on the HadISST1 during 1961-2020 for the lead time of year 1.  
 40 Positive ACCs which are statistically significant at 90 % confidence level using Student's *t*-  
 41 test are colored. (b-j) Same as in (a), but for the lead time from year 2 to year 10, respectively.

42

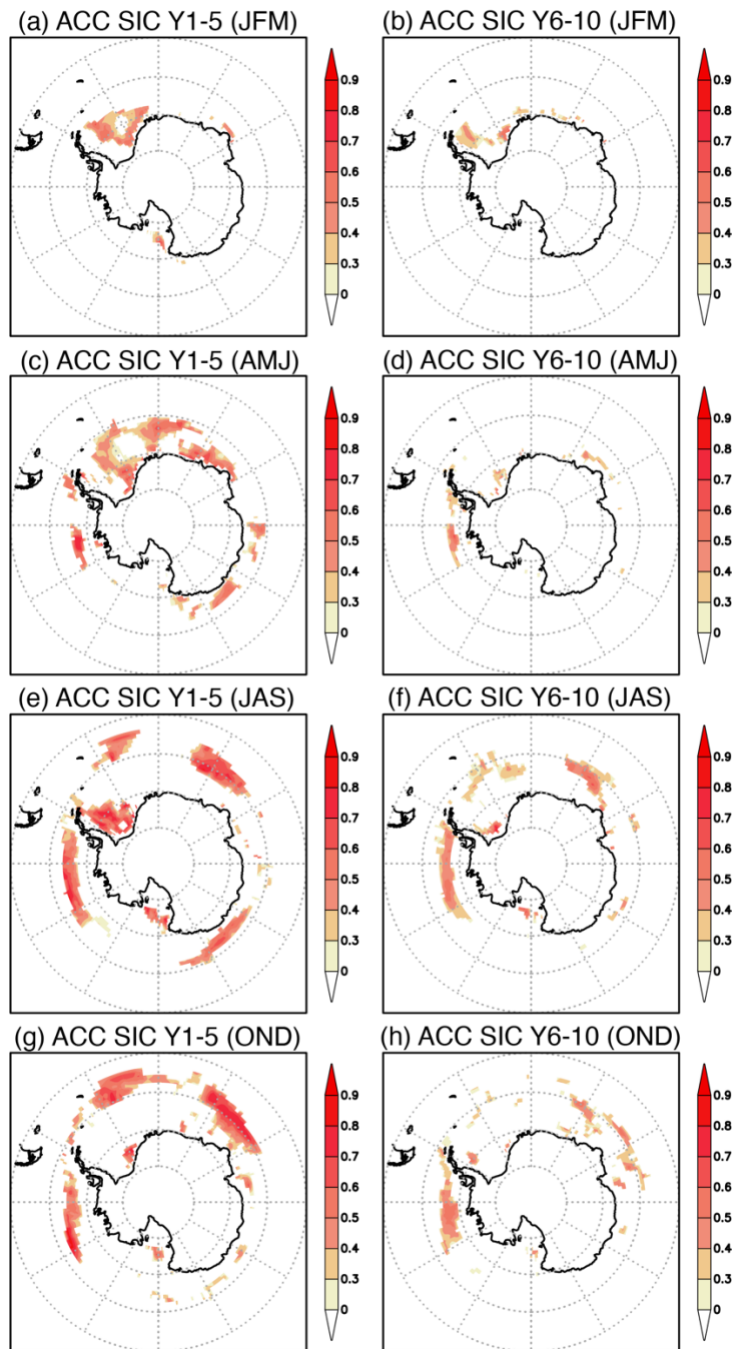

43

44 **Figure S6** Anomaly correlations between the observed SIC and the predicted SIC from the  
 45 SPEAR\_LO\_DRF during austral summer (January-March; JFM) of 1961-2020 for the lead  
 46 times of (a) year 1-5 and (b) year 6-10. Positive ACCs which are statistically significant at 90  
 47 % confidence level using Student's *t*-test are colored. Same as in (a, b), but for (c, d) austral  
 48 autumn (April-June; AMJ), (e, f) winter (July-September; JAS), and (g, h) spring (October-  
 49 December; OND).

50



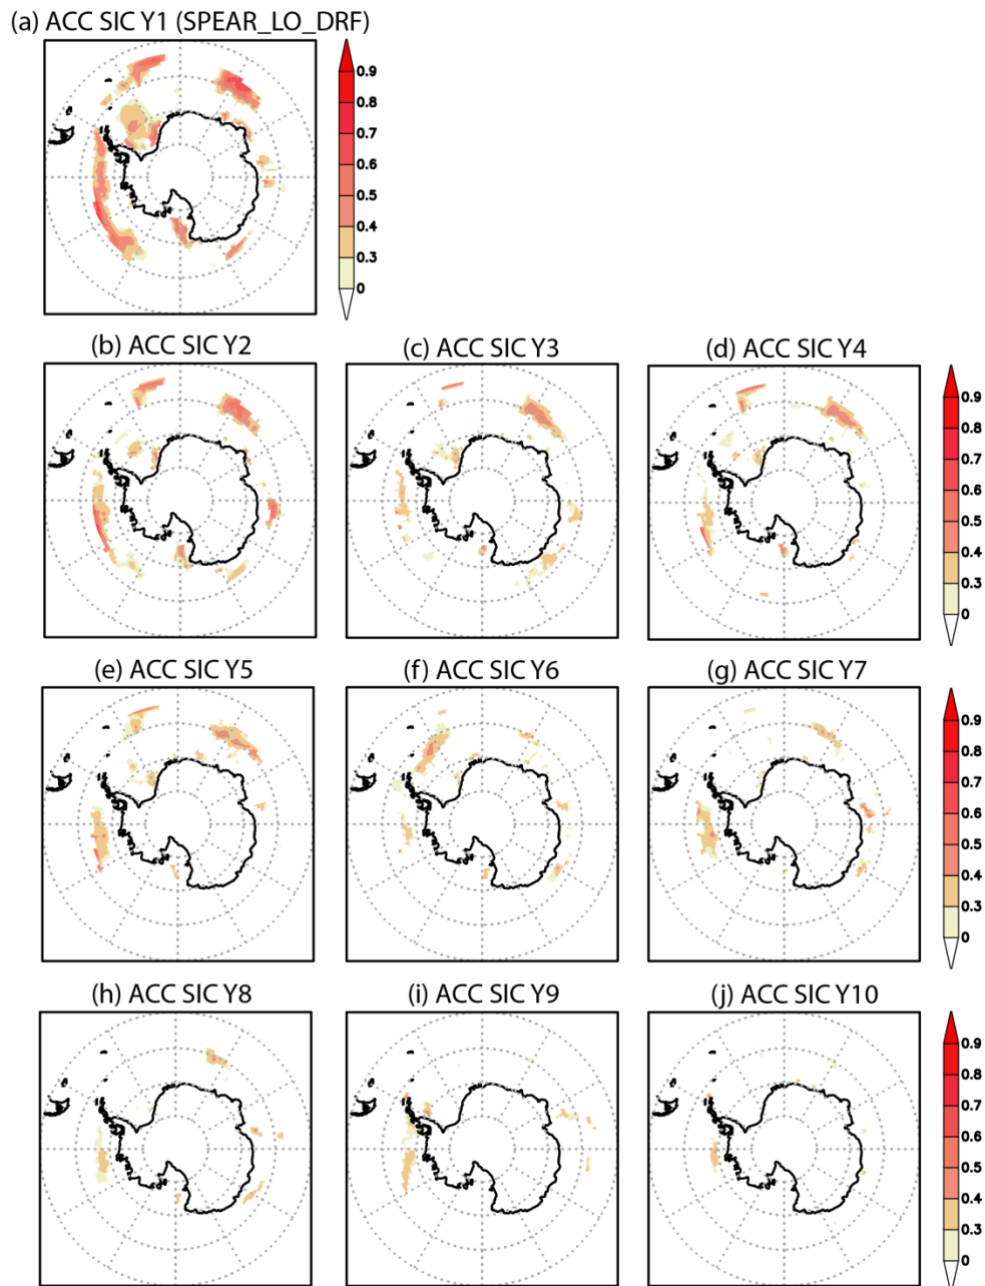

51

52 **Figure S7 (a)** Anomaly correlation (ACC) between the observed SIC and the predicted SIC  
 53 from the SPEAR\_LO\_DRF during 1961-2020 for the lead time of year 1. Positive ACCs which  
 54 are statistically significant at 90 % confidence level using Student's *t*-test are colored. **(b-j)**  
 55 Same as in **(a)**, but for the lead time from year 2 to year 10, respectively.

56

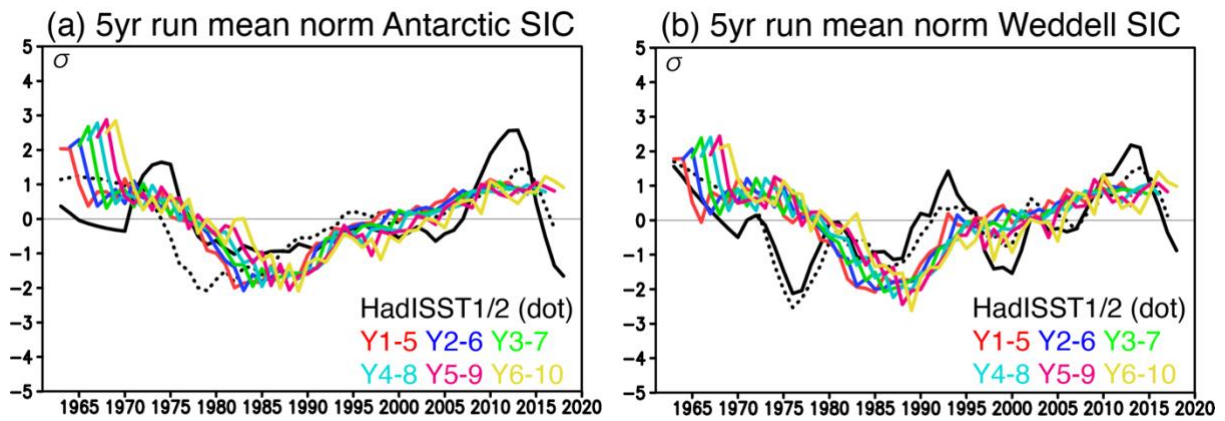

57

58 **Figure S8 (a)** Time series of 5-yr running mean pan-Antarctic SIC (in  $\sigma$ ) anomalies  
 59 normalized by standard deviation ( $\sigma$ ) during 1961-2020. Black lines show the observed SIC  
 60 anomalies from HadISST1 (solid) and HadISST2 (dotted), whereas other colored lines  
 61 correspond to the ensemble mean normalized SIC anomalies predicted at lead times from 1-5  
 62 years to 6-10 years in the SPEAR\_LO\_DRF. **(b)** Same as in **(a)**, but for the normalized SIC  
 63 anomalies averaged in the Weddell Sea.

64
